# Supplementary material for: LC3B Binds to the Autophagy Protease ATG4b with High Affinity Using a Bipartite Interface
Source: PubMed Central journal article supplement (PMC9631991; doi:10.1021/acs.biochem.2c00482), 2022-10-20
Supplement: bi2c00482_si_001.pdf [file bi2c00482_si_001.pdf]

Supporting Information

**LC3B binds to the autophagy protease ATG4b with high affinity using a bipartite interface**

*Yinyan Tang,<sup>†,‡</sup> Amber Kay,<sup>†,‡</sup> Ziwen Jiang,<sup>†,‡</sup> Michelle R. Arkin<sup>\*,†,‡</sup>*

<sup>†</sup>Department of Pharmaceutical Chemistry, <sup>‡</sup>Small Molecule Discovery Center, University of California, San Francisco, CA 94158, USA

\*Email: michelle.arkin@ucsf.edu (M.R.A.)

## Table of Contents

### 1. Supplementary figures and tables

**Figure S1.** (a) Representative mass spectra for LC3B constructs. The +178 peak is the a-N-gluconoylated version, a common post translational modification observed with proteins expressed with N-terminal His6 tag in *E. coli*. (b) SDS-PAGE protein gel of LC3B proteins.

**Figure S2.** Evaluation of binding between LC3B truncations and ATG4b by isothermal calorimetry (ITC).

**Figure S3.** A Representative mass spectrum for an MS-based assay to evaluate the cleavage of pro-LC3B.

**Figure S4.** Sequence alignment of the C-terminal tail of ATG4b with (a) p62 tail or (b) ATG7.

**Figure S5.** SDS-PAGE protein gel for all ATG4b constructs.

**Figure S6.** Representative SPR sensorgrams of ATG4b proteins binding to LC3B-I fit to a 1:1 kinetic binding model.

**Figure S7.** Representative SPR sensorgrams of ATG4b proteins binding to LC3B-115 fit to a 1:1 kinetic binding model.

**Table S1.** Expected masses and observed masses for LC3B constructs.

**Table S2.** Kinetic rate constants for binding of LC3B-I and LC3B-115 to ATG4b truncations.

**Table S3.** Primers used to make ATG4b constructs.

**Table S4.** Primer combinations for ATG4b pDuet vector constructs.

**Table S5.** Primers used to make LC3B constructs.

**Table S6.** Primer combinations for LC3B N-His-Avi vector constructs.

### 2. Supplementary sequences

## 1. Supplementary figures and tables

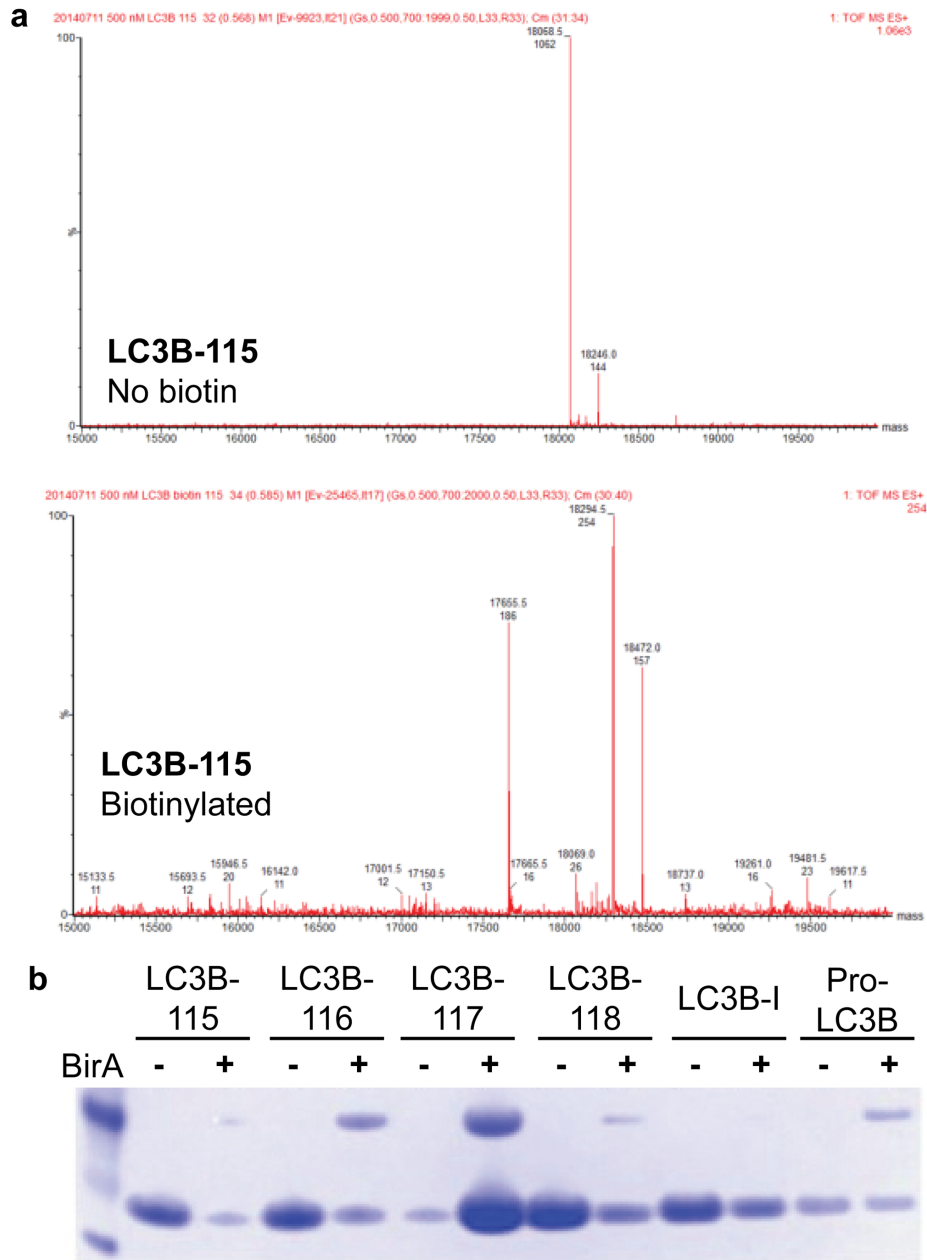

**Figure S1.** (a) Representative mass spectra for LC3B constructs. The +178 peak is the a-N-gluconoylated version, a common post translational modification observed with proteins expressed with N-terminal His6 tag in *E. coli*. (b) SDS-PAGE protein gel of LC3B proteins.

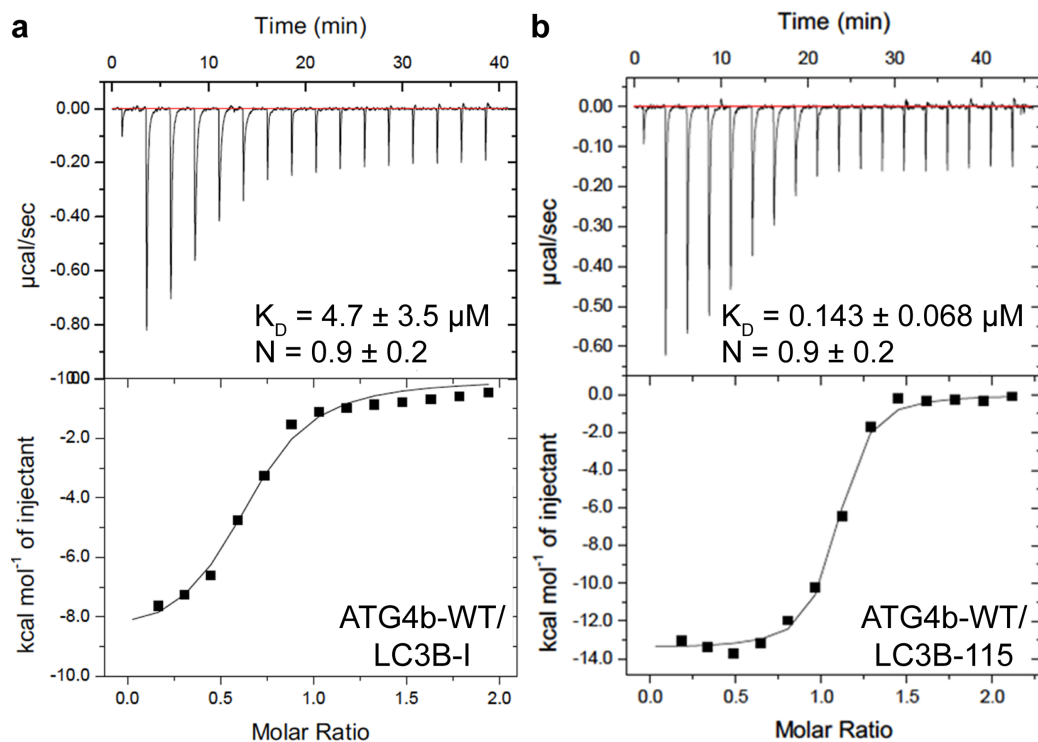

**Figure S2.** Evaluation of binding between LC3B truncations and ATG4b by isothermal calorimetry (ITC). Representative data are shown for ATG4b WT binding to LC3B-I and LC3B-115: (a) A 700- $\mu\text{M}$  solution of ATG4b was titrated into 68  $\mu\text{M}$  LC3B-I; (b) 100  $\mu\text{M}$  solution of ATG4b titrated into 10  $\mu\text{M}$  LC3B-115.  $N$  and  $K_D$  values are the mean and standard deviation for five independent experiments; data are shown for one representative measurement.

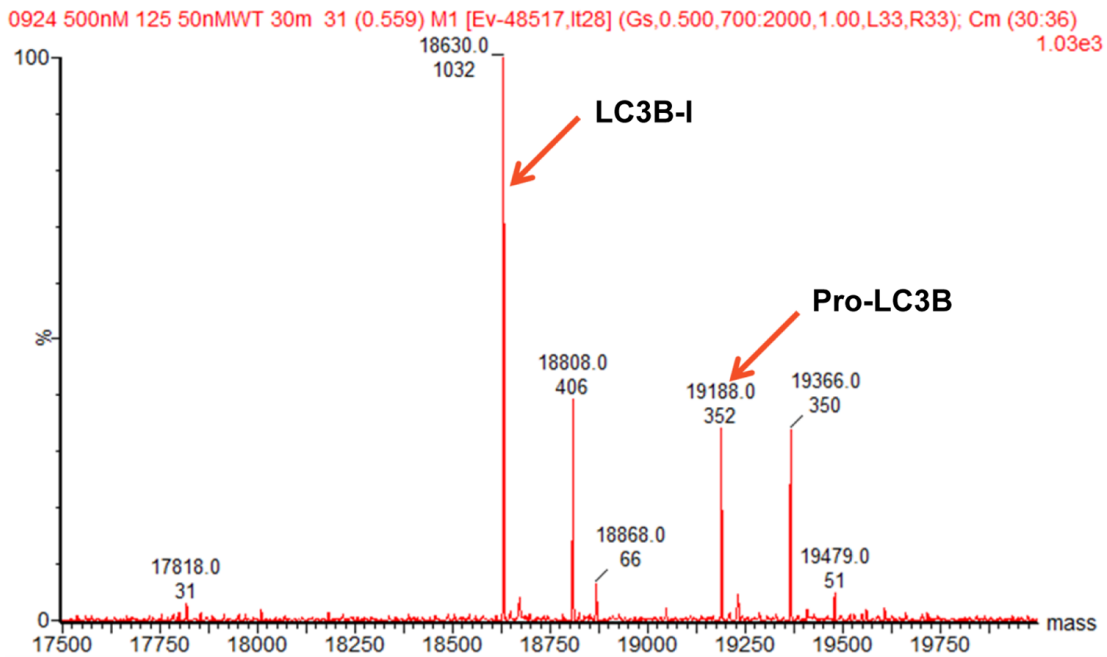

**Figure S3.** A Representative mass spectrum for an MS-based assay to evaluate the cleavage of pro-LC3B. The arrows are pointing to the masses corresponding to pro-LC3B (substrate) and LC3B-I (product), respectively.

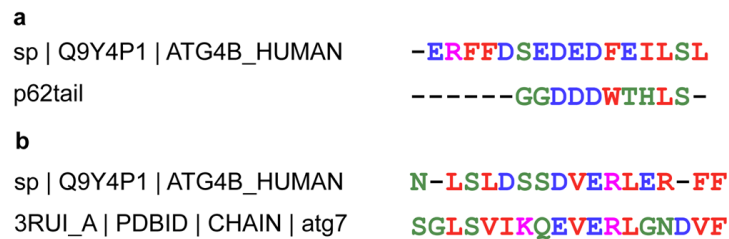

**Figure S4.** Sequence alignment of the C-terminal tail of ATG4b with (a) p62 tail or (b) ATG7.

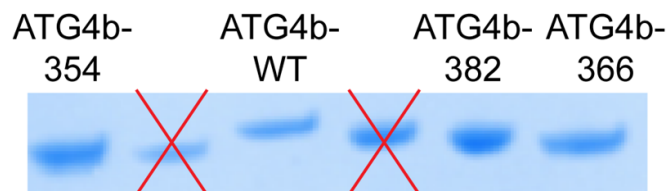

**Figure S5.** SDS-PAGE protein gel for all ATG4b constructs.

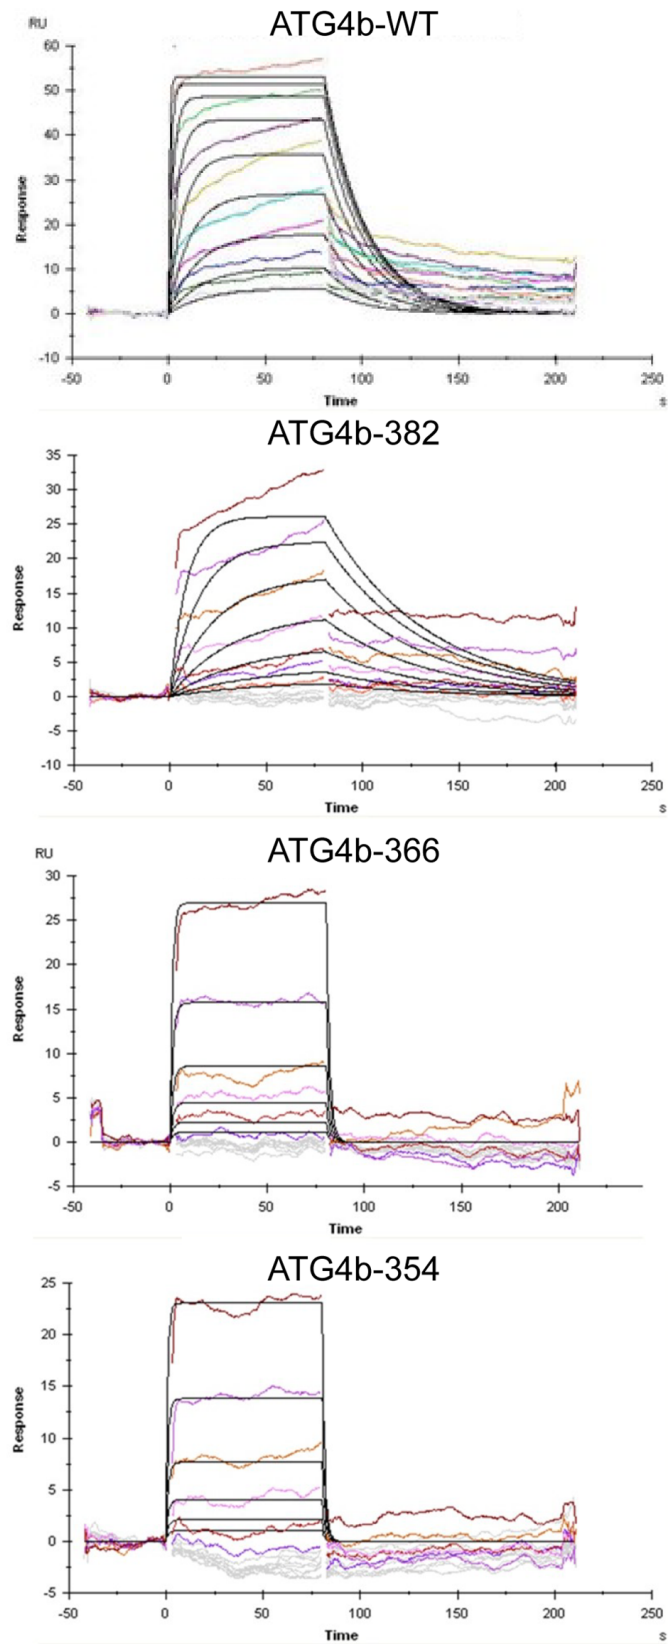

**Figure S6.** Representative SPR sensorgrams of ATG4b proteins binding to LC3B-I fit to a 1:1 kinetic binding model.

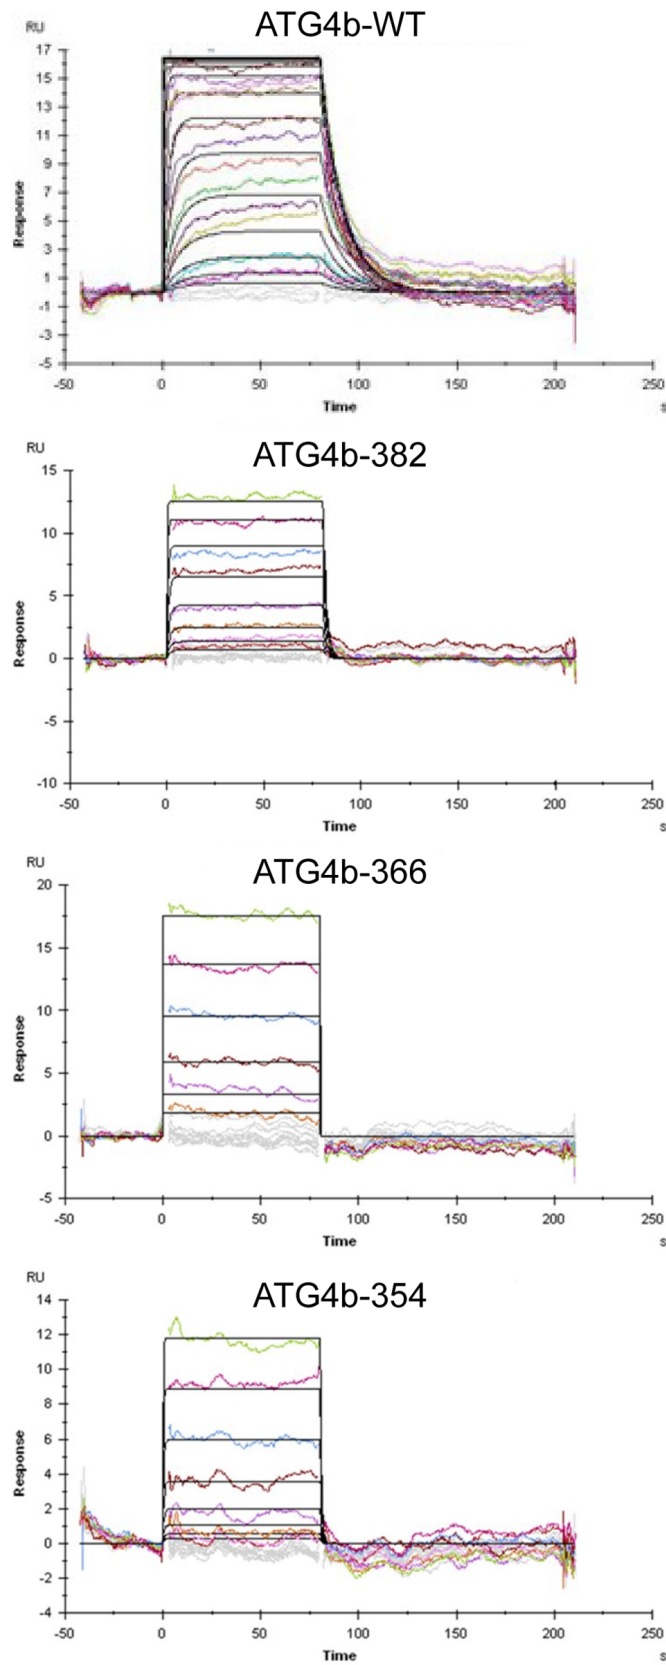

**Figure S7.** Representative SPR sensorgrams of ATG4b proteins binding to LC3B-115 fit to a 1:1 kinetic binding model.

**Table S1.** Expected masses and observed masses for LC3B constructs.

|                       | Expected | Observed | <i>in vivo</i> biotinylation (%) |
|-----------------------|----------|----------|----------------------------------|
| LC3B-115              | 18068.5  | 18068.5  | 91%                              |
| Biotinylated LC3B-115 | 18295.5  | 18294.5  |                                  |
| LC3B-116              | 18196.6  | 18196.5  | 75%                              |
| Biotinylated LC3B-116 | 18423.6  | 18423.0  |                                  |
| LC3B-118              | 18426.8  | 18426.5  | 50%                              |
| Biotinylated LC3B-118 | 18653.8  | 18625.5  |                                  |
| LC3B-I                | 18631.0  | 18631.0  | 27%                              |
| Biotinylated LC3B-I   | 18858.0  | 18858.0  |                                  |
| Pro-LC3B              | 19189.8  | 19189.5  | 64%                              |
| Biotinylated pro-LC3B | 19416.0  | 19416.5  |                                  |

**Table S2.** Kinetic rate constants for binding of LC3B-I and LC3B-115 to ATG4b truncations.

|                  | LC3B-I                                |                        |                           | LC3B-115                              |                        |                           |
|------------------|---------------------------------------|------------------------|---------------------------|---------------------------------------|------------------------|---------------------------|
|                  | $k_{on}$ ( $M^{-1}S^{-1}$ )           | $k_{off}$ ( $S^{-1}$ ) | Kinetic $K_D$ ( $\mu M$ ) | $k_{on}$ ( $M^{-1}S^{-1}$ )           | $k_{off}$ ( $S^{-1}$ ) | Kinetic $K_D$ ( $\mu M$ ) |
| <b>ATG4b-WT</b>  | $8.6 \times 10^5 \pm 9.7 \times 10^4$ | $0.046 \pm 0.02$       | $0.084 \pm 0.047$         | $5.5 \times 10^6 \pm 8.4 \times 10^5$ | $0.045 \pm 0.007$      | $0.0084 \pm 0.0019$       |
| <b>ATG4b-382</b> | No fit                                | No fit                 | No fit                    | $1.9 \times 10^5 \pm 6.5 \times 10^4$ | $0.82 \pm 0.28$        | $4.4 \pm 0.6$             |
| <b>ATG4b-366</b> | $1.7 \times 10^4 \pm 1.7 \times 10^4$ | $0.59 \pm 0.22$        | $87 \pm 11$               | $1.4 \times 10^5 \pm 3.8 \times 10^4$ | $1.3 \pm 0.5$          | $9.5 \pm 1.4$             |
| <b>ATG4b-354</b> | $3.6 \times 10^3 \pm 9.7 \times 10^4$ | $0.51 \pm 0.27$        | $140 \pm 74$              | $7.5 \times 10^4 \pm 3.8 \times 10^4$ | $1.1 \pm 0.4$          | $15.7 \pm 8.4$            |



**Table S3.** Primers used to make ATG4b constructs.

| Primer Name | Primer sequences (5'-3')                         |
|-------------|--------------------------------------------------|
| P1          | GCTCGGCGCGCCTGCAGGTCGACATGGACGCAGCTACTCTGACCTAC  |
| P2          | GGTTTCTTTACCAGACTCGAGTCAAAGGGACAGGATTTCAAAGTCTTC |
| P3          | GGTTTCTTTACCAGACTCGAGTCACTGCTCCACCAGCTCAAACATGGG |
| P4          | GGTTTCTTTACCAGACTCGAGTCAGTCGAAGAATCTTTCCAGTCGCTC |
| P5          | GGTTTCTTTACCAGACTCGAGTCAGTTCAGGACGTCGGGGCAGGCCAG |

**Table S4.** Primer combinations for ATG4b pET-15b vector constructs.

| No. | Primer combination | Constructs | Notes                 |
|-----|--------------------|------------|-----------------------|
| 1   | P1 + P2            | ATG4b-WT   | Full length           |
| 2   | P1 + P3            | ATG4b-354  | C-terminal truncation |
| 3   | P1 + P4            | ATG4b-382  | c-terminal truncation |
| 4   | P1 + P5            | ATG4b-366  | c-terminal truncation |

**Table S5.** Primers used to make LC3B constructs.

| Primer Name | Primer sequence (5'-3')    |
|-------------|----------------------------|
| P6          | ATGCCGTCGGAGAAGACCTTCAAG   |
| P7          | CACTGACAATTTTCATCCCGAACGTC |
| P8          | CCCGAACGTCTCCTGGGAGGCACAG  |
| P9          | CGTCTCCTGGGAGGCACAGACCATG  |
| P10         | GGAGGCACAGACCATGTACAGGAATC |

**Table S6.** Primer combinations for LC3B N-His-Avi vector constructs.

| No. | Primer combination | Constructs | Notes                       |
|-----|--------------------|------------|-----------------------------|
| 1   | P6 + P7            | Pro-LC3B   | Pro-LC3B full length        |
| 2   | P6 + P8            | LC3B-I     | LC3B-I full length          |
| 3   | P6 + P9            | LC3B-118   | Ubiquitin core + 3 residues |
| 4   | P6 + P10           | LC3B-115   | Ubiquitin core              |

## 2. Supplementary sequences

**LC3B-115:** HisTag—TEV cleavage sequence—AviTag—LC3B(1-115) (Vector backbone: pET-15b)

MGSSHHHHHHSSGENLYFQGHMSGLNDIFEAQKIEWHEGGGSMPSEKTFKQRRTFEQRVEDVRLIREQH  
PTKIPVIIERYKGEKQLPVLDTKFLVPDHVNMSELIKIIRRLQLNANQAFFLLVNGHSMVSVSTPIS  
EVYESEKDEDGFLYMVCAS\*

**LC3B-116:** HisTag—TEV cleavage sequence—AviTag—LC3B(1-116) (Vector backbone: pET-15b)

MGSSHHHHHHSSGENLYFQGHMSGLNDIFEAQKIEWHEGGGSMPSEKTFKQRRTFEQRVEDVRLIREQH  
PTKIPVIIERYKGEKQLPVLDTKFLVPDHVNMSELIKIIRRLQLNANQAFFLLVNGHSMVSVSTPIS  
EVYESEKDEDGFLYMVCASQ\*

**LC3B-118:** HisTag—TEV cleavage sequence—AviTag—LC3B(1-118) (Vector backbone: pET-15b)

MGSSHHHHHHSSGENLYFQGHMSGLNDIFEAQKIEWHEGGGSMPSEKTFKQRRTFEQRVEDVRLIREQH  
PTKIPVIIERYKGEKQLPVLDTKFLVPDHVNMSELIKIIRRLQLNANQAFFLLVNGHSMVSVSTPIS  
EVYESEKDEDGFLYMVCASQET\*

**LC3B-I:** HisTag—TEV cleavage sequence—AviTag—LC3B(1-120) (Vector backbone: pET-15b)

MGSSHHHHHHSSGENLYFQGHMSGLNDIFEAQKIEWHEGGGSMPSEKTFKQRRTFEQRVEDVRLIREQH  
PTKIPVIIERYKGEKQLPVLDTKFLVPDHVNMSELIKIIRRLQLNANQAFFLLVNGHSMVSVSTPIS  
EVYESEKDEDGFLYMVCASQETFG\*

**Pro-LC3B:** HisTag—TEV cleavage sequence—AviTag—LC3B(1-125) (Vector backbone: pET-15b)

MGSSHHHHHHSSGENLYFQGHMSGLNDIFEAQKIEWHEGGGSMPSEKTFKQRRTFEQRVEDVRLIREQH  
PTKIPVIIERYKGEKQLPVLDTKFLVPDHVNMSELIKIIRRLQLNANQAFFLLVNGHSMVSVSTPIS  
EVYESEKDEDGFLYMVCASQETFGMKLSV\*

**ATG4b-WT:** HisTag—TEV cleavage sequence—AviTag—AT4b(1-393) (Vector backbone: pET-15b)

MGSSHHHHHHSSGENLYFQGHMSGLNDIFEAQKIEWHEGGGSMDAATLTLYDTLRF AEFEDFPETSEPVW  
ILGRKYSIFTEKDEILSDVASRLWFTYRKNFPAIGGTGPTSDTGWGCMLRCGQMIFAQALVCRHLGRDW  
RWTQRKRQPD SYF SVLNAFIDRKDSYYSIHQIAQMGVGEKSGIQWYGPNTVAQVLKKLAVFDTWSSLA  
VHIAMDNTVVMEEIRRLCRTSVPCAGATAFPADSDRHCNGFPAGAEVTNRPSWRPLVLLIPLRLGLTD  
INEAYVETLKHCFMMPQSLGVIGGKPN SAHYFIGYVGEELIYLDPHTTQPAVEPTDGC FIPDES FHCQH  
PPCRMSIAELDPSI AVGFFCKTEDDFNDWCQQVKLSLLGGALPMFELVEQQP SHLACPDVNLNLSLDS  
DVERLERFFDSEDED FEILSL\*

**ATG4b-382:** HisTag—TEV cleavage sequence—AviTag—AT4b(1-382) (Vector backbone: pET-15b)

MGSSHHHHHHSSGENLYFQGHMSGLNDIFEAQKIEWHEGGGSMDAATLTYDTLRFAEFEDFPETSEPVW  
ILGRKYSIFTEKDEILSDVASRLWFTYRKNFPAIGGTGPTSDTGWGCMRLRCGQMIFAQALVCRHLGRDW  
RWTQRKRQPDSYFVSNLAFIDRKDSYYSIHQIAQMGVGEKSGIQWYGPNTVAQVLKKLAVFDTWSSLA  
VHIAMDNTVVMEEIRRLCRTSVPCAGATAFPADSDRHCNGFPAGAEVTNRPSRWRPLVLLIPLRLGLTD  
INEAYVETLKHC FMMPQSLGVI GGKPN SAHYFIGYVGEELIYLDPHTTQPAVEPTDGC FIPDES FHCQH  
PPCRMSIAELDPSIAVGFFCKTEDDFNDWCQQVKKLSLLGGALPMFELVEQQPSHLACPDVLNLSLDSS  
DVERLERFFD\*

**ATG4b-366:** HisTag—TEV cleavage sequence—AviTag—AT4b(1-366) (Vector backbone: pET-15b)

MGSSHHHHHHSSGENLYFQGHMSGLNDIFEAQKIEWHEGGGSMDAATLTYDTLRFAEFEDFPETSEPVW  
ILGRKYSIFTEKDEILSDVASRLWFTYRKNFPAIGGTGPTSDTGWGCMRLRCGQMIFAQALVCRHLGRDW  
RWTQRKRQPDSYFVSNLAFIDRKDSYYSIHQIAQMGVGEKSGIQWYGPNTVAQVLKKLAVFDTWSSLA  
VHIAMDNTVVMEEIRRLCRTSVPCAGATAFPADSDRHCNGFPAGAEVTNRPSRWRPLVLLIPLRLGLTD  
INEAYVETLKHC FMMPQSLGVI GGKPN SAHYFIGYVGEELIYLDPHTTQPAVEPTDGC FIPDES FHCQH  
PPCRMSIAELDPSIAVGFFCKTEDDFNDWCQQVKKLSLLGGALPMFELVEQQPSHLACPDVLN\*

**ATG4b-354:** HisTag—TEV cleavage sequence—AviTag—AT4b(1-354) (Vector backbone: pET-15b)

MGSSHHHHHHSSGENLYFQGHMSGLNDIFEAQKIEWHEGGGSMDAATLTYDTLRFAEFEDFPETSEPVW  
ILGRKYSIFTEKDEILSDVASRLWFTYRKNFPAIGGTGPTSDTGWGCMRLRCGQMIFAQALVCRHLGRDW  
RWTQRKRQPDSYFVSNLAFIDRKDSYYSIHQIAQMGVGEKSGIQWYGPNTVAQVLKKLAVFDTWSSLA  
VHIAMDNTVVMEEIRRLCRTSVPCAGATAFPADSDRHCNGFPAGAEVTNRPSRWRPLVLLIPLRLGLTD  
INEAYVETLKHC FMMPQSLGVI GGKPN SAHYFIGYVGEELIYLDPHTTQPAVEPTDGC FIPDES FHCQH  
PPCRMSIAELDPSIAVGFFCKTEDDFNDWCQQVKKLSLLGGALPMFELVEQ\*

**CFP-LC3B-YFP:** HisTag—CFP—LC3B—YFP

MHHHHHMMVSKGEELFTGVVPII LVELDGDVNGHKFSVSGEGEGDATYGLKTLKFICTTGKLPVPWPPTLV  
TTLTWGVQCFSRYPDHMKQHDFFKSAMPEGYVQERTIFFKDDGNYKTRAEVKFEGDTLVNRIELKIDF  
KEDGNILGHKLENYNISHNVYITADKQKNGIKANFKIRHNIEDG SVQLADHYQQNTPIGDGPVLLPDNH  
YLSTQSALS KDPNEKRDH MVLL E FVTAAGITLGMDELYKGSMPSEKTFKQRRTFEQRVEDVRLIREQHP  
TKIPVIERYKGEKQLPVL DKT KFLV PDHVN MSELIKI IRRRLQLNANQAFFLLVNGHSMVSVSTPISE  
VYESEKDEDGFLYMYASQETFGMKLSVKLMVSKGEELFTGVVPII LVELDGDVNGHKFSVSGEGEGDAT  
YGLKTLKFICTTGKLPVPWPPTLVTTFGYGLQCFARYPDHMKQHDFFKSAMPEGYVQERTIFFKDDGNYK  
TRAEVKFEGDTLVNRIELKIDFKEDGNILGHKLENYNISHNVYIMADKQKNGIKVNFKIRHNIEDG SV  
QLADHYQQNTPIGDGPVLLPDNH YLSYQSALS KDPNEKRDH MVLL E FVTAAGITLGMDELYK\*
